# Supplementary material for: Early Renal Vasodilator and Hypotensive Action of Epoxyeicosatrienoic Acid Analog (EET-A) and 20-HETE Receptor Blocker (AAA) in Spontaneously Hypertensive Rats
Source: PubMed Central journal article supplement (PMC7876274; doi:10.3389/fphys.2021.622882), 2021-01-28
Supplement: Table_1.pdf [file Table_1.pdf]

Suppl, Table 1. Effects of EET-A on mean arterial blood pressure (MABP), total renal blood flow (RBF), cortical blood flow (CBF) and inner medullary blood flow (IMBF) in rats pretreated with *c*-AUCB.

|               | <b>c-AUCB+EET-A</b> | <b>solvent+EET-A</b> |
|---------------|---------------------|----------------------|
| <b>MABP</b>   | <b>mmHg</b>         |                      |
| Control       | 178±5.1             | 192±6.3              |
| Exp 30'       | 184±5.5             | 190±2.6              |
| Exp 60'       | 181±5.2             | 193±5.3              |
| Recovery 90'  | 176±4.3             | 187±5.9              |
| Recovery 120' | 174±3.5             | 180±6.1*             |
| <b>RBF</b>    | <b>ml/min</b>       |                      |
| Control       | 5.7±0.6             | 6.4±0.7              |
| Exp 30'       | 6.8±0.6*            | 7.2±0.8*             |
| Exp 60'       | 7.2±0.6*            | 8.1±1.0*             |
| Recovery 90'  | 7.1±0.6*            | 8.1±0.9*             |
| Recovery 120' | 7.1±0.6*            | 8.0±1.0*             |
| <b>CBF</b>    | <b>PU</b>           |                      |
| Control       | 457±17              | 483±27               |
| Exp 30'       | 535±22*             | 494±24               |
| Exp 60'       | 559±37*             | 572±40*              |
| Recovery 90'  | 566±46*             | 574±36*              |
| Recovery 120' | 574±47*             | 582±38*              |
| <b>IMBF</b>   | <b>PU</b>           |                      |
| Control       | 162±26              | 158±21               |
| Exp 30'       | 165±29              | 157±22               |
| Exp 60'       | 171±32              | 157±23               |
| Recovery 90'  | 173±34*             | 169±22               |
| Recovery 120' | 186±38              | 177±21*              |

Means ± SEM, n=7, \* significantly different from the control (p<0.05 or less)
